# Supplementary material
Source: publisher figshare collection journal article supplement (https://acs.figshare.com/ndownloader/files/21728511)
Supplement: Supplementary file 1 [file 21728511]

# Supporting Information

## Reversible Nontoxic Thermochromic Microcapsules

*Bingxin Liu<sup>†</sup>, Alicia Rasines Mazo<sup>†</sup>, Paul A. Gurr<sup>†</sup>, Greg G. Qiao<sup>†\*</sup>*

<sup>†</sup>Polymer Science Group, Department of Chemical Engineering, The University of Melbourne, Parkville, VIC 3010, Australia

\*Corresponding author: gregghq@unimelb.edu.au

## Content

**Figure S1.** The UV-Vis spectra of w/o emulsion of CPR aqueous solution ( $10^{-3}$ M) in toluene (volume ratio of 1:10) at melted (25 °C) and frozen states (-196 °C).

**Figure S2.** The DSC heat flow curve of CPR aqueous solution (0.001M) in heating and cooling processes between -60 °C and 20 °C (5 °C/min).

**Figure S3.** Optical microscopy images of NIH-3T3 fibroblast cells (A) control, (B) incubated with 2 mg/mL microcapsules after 24h and (C) incubated with films (20 wt.% microcapsules in film) after 24h.

**Table S1.** Thermal parameters of core solution, microcapsules and incorporated film.

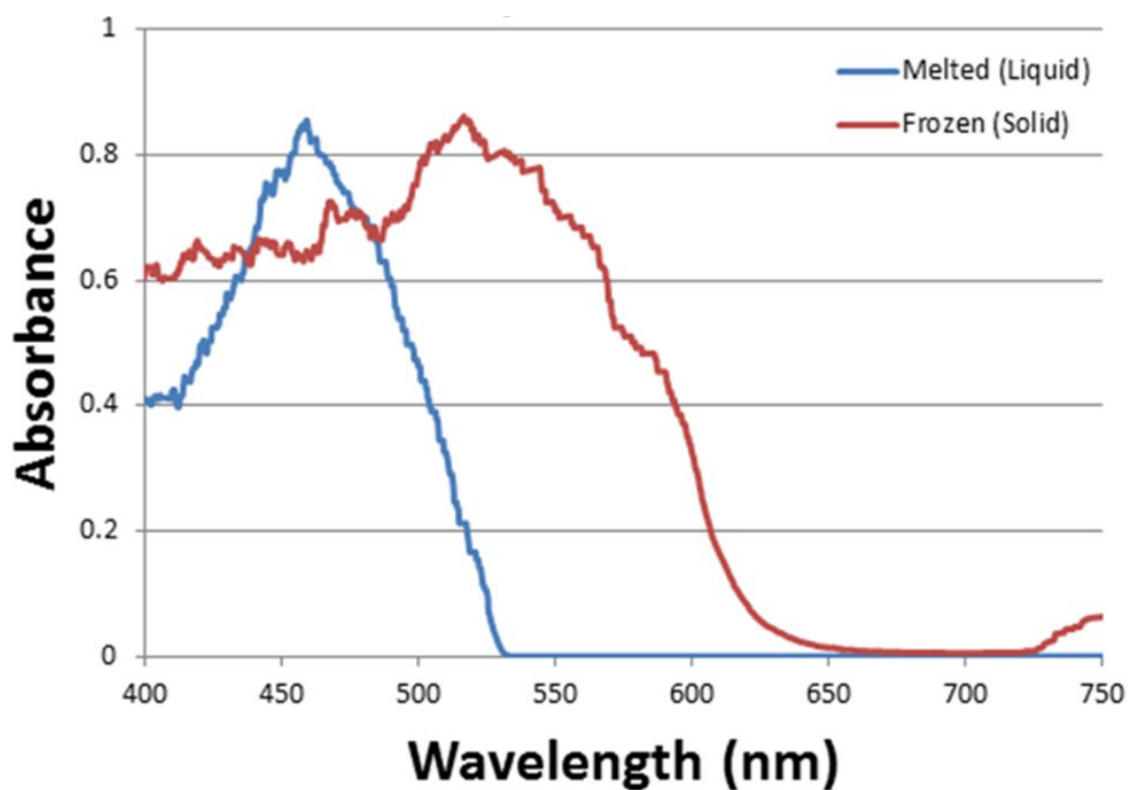

**Figure S1.** The UV-Vis spectra of w/o emulsion of CPR aqueous solution (10<sup>-3</sup>M) in toluene (volume ratio of 1:10) at melted (25 °C) and frozen states (-196 °C).

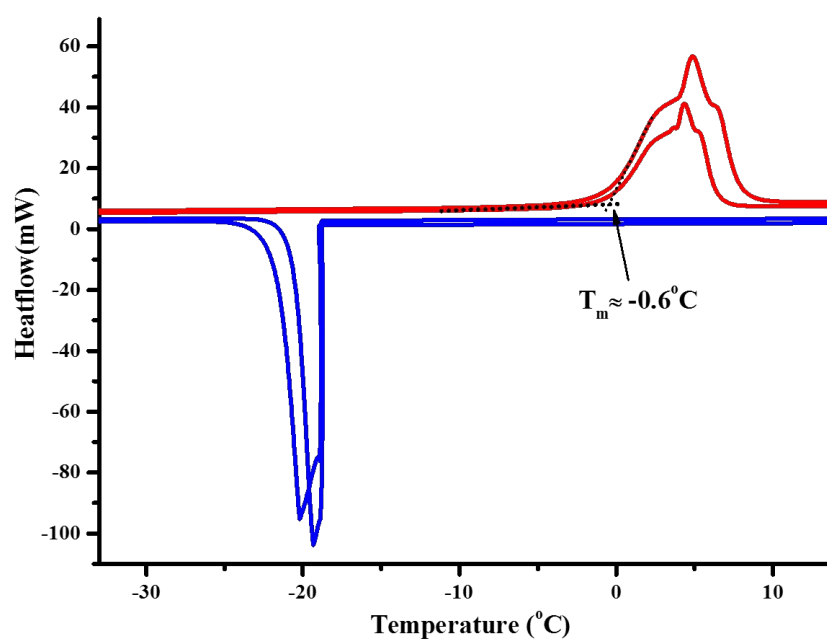

**Figure S2.** The DSC heat flow curve of CPR aqueous solution (0.001M) in heating and cooling processes between -60 °C and 20 °C (5 °C/min).

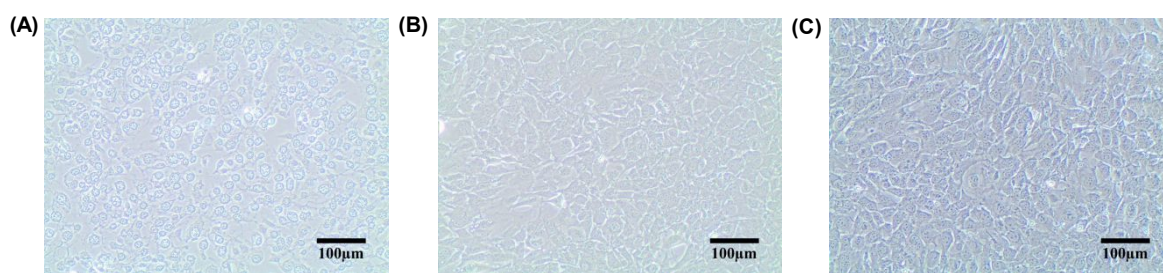

**Figure S3.** Optical microscopy images of NIH-3T3 fibroblast cells (A) control, (B) incubated with 2 mg/mL microcapsules after 24h and (C) incubated with films (20 wt.% microcapsules in film) after 24h.

**Table S1.** Thermal parameters of core solution, microcapsules and incorporated film.

| Samples           | $T_m$ (°C) | Deviation (°C) |
|-------------------|------------|----------------|
| Core CPR solution | -0.6       | 0.2            |
| Microcapsules     | -2.8       | 0.3            |
| Film              | -3.0       | 0.3            |
